# Supplementary material for: Expression of Macrophage Scavenger Receptor (MSR1) in Peripheral Blood Cells from Patients with Different Respiratory Diseases: Beyond Monocytes
Source: MDPI journal article supplement (doi:10.3390/jcm11051439), 2022-03-05
Supplement: s1 [file s1]

## Supplementary Material

### Results

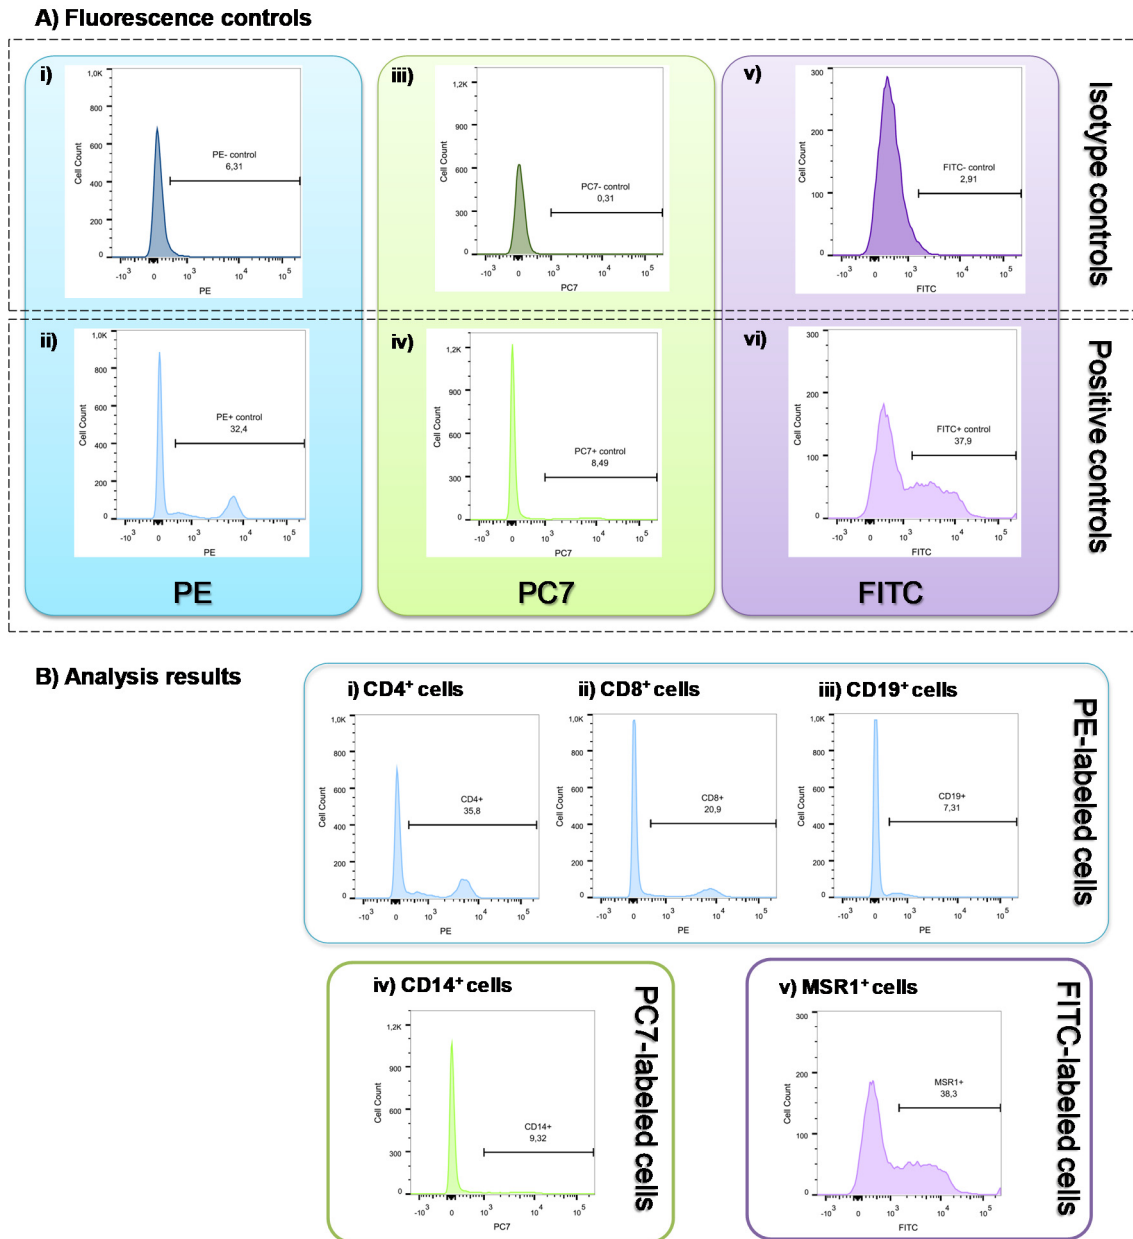

**Figure S1. Representative example of flow cytometry results of an AA patient in isolated PBMCs.** A) Fluorescence controls. Positive and negative (isotype) controls of the different fluorochromes used: i) PE- and ii) PE+, used for CD4, CD8 and CD19 label; iii) PC7- and iv) PC7+, for CD14 label; and v) FITC- and vi) FITC+, used for the MSR1 label. B) Histogram representation of the results obtained in an AA patient, representing the total cell counts for each subpopulation studied in PBMCs sample: i) CD4<sup>+</sup> cells, ii) CD8<sup>+</sup> cells, iii) CD19<sup>+</sup> cells; iv) CD14<sup>+</sup> cells; and v) MSR1<sup>+</sup> cells.

*Distribution of cell subpopulations in isolated PBMC samples determined by flow cytometry*

Tables S1 shows the mean percentages of each cellular subpopulation analyzed (CD4<sup>+</sup> and CD8<sup>+</sup> T lymphocytes, B lymphocytes, and monocytes) in each clinical phenotype regardless of their MSR1 expression. Statistically significant differences were observed in CD4<sup>+</sup> and CD14<sup>+</sup> cells when were analyzed according to the severity of the diseases. On the one hand, patients with moderate-mild COPD showed a higher percentage of CD4<sup>+</sup> T lymphocytes when compared to severe COPD (p=0.0435), to moderate-mild NA (p=0.0183), and to moderate-mild AA patients (p=0.0023). On the other hand, the percentage of CD14<sup>+</sup> cells was significantly higher in the moderate-mild AA group than in the moderate-mild NA group (p=0.0378).

**Table S1: Mean values of the cell subpopulations studied in PBMCs**

| Severity of disease      |               | %CD4 <sup>+</sup> cells | %CD8 <sup>+</sup> cells | %CD19 <sup>+</sup> cells | %CD14 <sup>+</sup> cells |
|--------------------------|---------------|-------------------------|-------------------------|--------------------------|--------------------------|
| <b>C group (n=11)</b>    |               | 45.94 ± 14.67           | 20.48 ± 4.26            | 4.45 ± 1.85              | 8.12 ± 5.84              |
| <b>NA group (n=11)</b>   |               | 43.80 ± 12.22           | 21.59 ± 7.38            | 5.59 ± 4.24              | 9.21 ± 4.16              |
|                          | MM NA (n=6)   | 38.50 ± 12.25*          | 19.58 ± 7.59            | 5.03 ± 2.58              | 7.90 ± 2.47*             |
|                          | S NA (n=5)    | 50.16 ± 9.64            | 24.00 ± 7.12            | 6.26 ± 5.98              | 10.78 ± 5.47             |
| <b>AA group (n=13)</b>   |               | 43.91 ± 6.99            | 18.82 ± 6.24            | 5.17 ± 3.28              | 12.02 ± 4.24             |
|                          | MM AA (n=6)   | 40.92 ± 5.59**          | 21.42 ± 5.87            | 4.27 ± 2.93              | 10.65 ± 1.35             |
|                          | S AA (n=7)    | 45.61 ± 8.02            | 16.59 ± 6.04            | 5.94 ± 3.59              | 13.20 ± 5.56             |
| <b>COPD group (n=11)</b> |               | 46.84 ± 13.31           | 19.08 ± 6.40            | 4.31 ± 2.98              | 12.21 ± 6.27             |
|                          | MM COPD (n=5) | 55.40 ± 4.95            | 20.18 ± 2.53            | 4.96 ± 4.28              | 10.56 ± 2.02             |
|                          | S COPD (n=6)  | 39.70 ± 14.15*          | 18.17 ± 8.63            | 3.77 ± 1.54              | 13.58 ± 8.39             |

C: Control, NA: Nonallergic Asthmatic, AA: Allergic Asthmatic, COPD: chronic obstructive respiratory disease. MM: moderate-mild diagnosis, S: severe diagnosis. %CD4<sup>+</sup> cells column: \*Statistically significant comparison (p<0.05) between the indicated group and the moderate-mild COPD group. \*\*Statistically significant comparison (p<0.01) between the indicated group and the moderate-mild COPD group. %CD14<sup>+</sup> cells column: \*Statistically significant comparison (p<0.05) between the indicated group and the moderate-mild AA group.

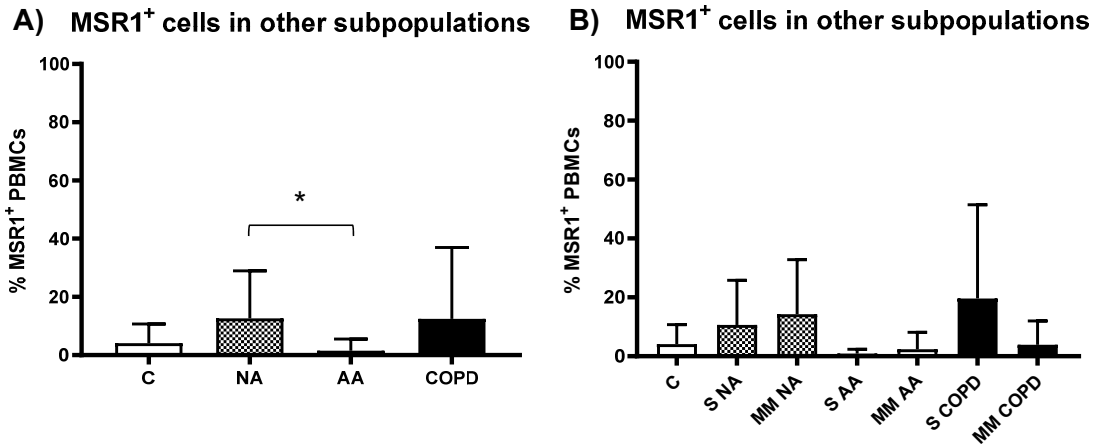

**Figure S2. Expression of MSR1 on PBMCs.** C: Control (n=11), NA: Nonallergic Asthma (n=11), AA: Allergic Asthma (n=13), COPD (n=11), S: severe diagnosis; MM: moderate–mild diagnosis. Mean percentage of MSR1<sup>+</sup> cells within the non-studied cellular subpopulations according to A) clinical groups and B) disease severity. \*Statistically significant differences ( $p < 0.05$ ) between the indicated groups.
